# Supplementary material for: Safety Analysis of Korean Cottage Industries’ Doenjang, a Traditional Fermented Soybean Product: A Special Reference to Biogenic Amines
Source: MDPI journal article supplement (doi:10.3390/foods12224084), 2023-11-10
Supplement: s1 [file s1]

## Supplementary Data

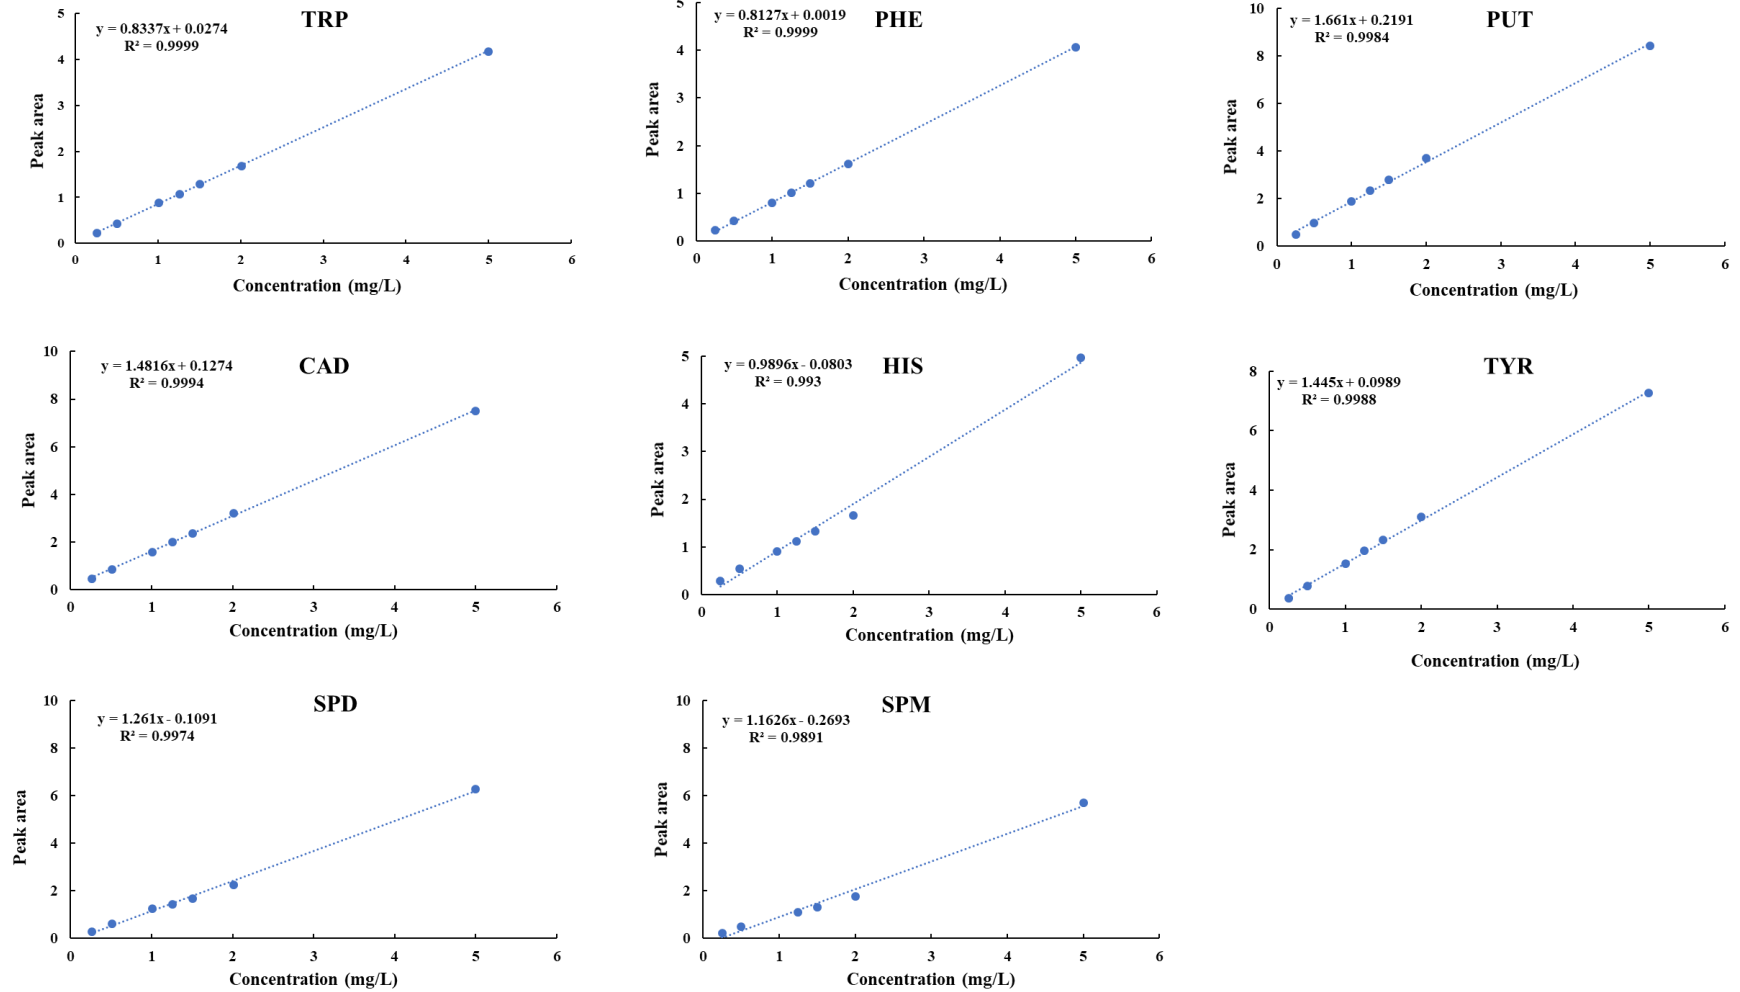

Supplementary Figure S1: Standard curves of different biogenic amines

**Supplementary Table S1: Details of the selected *doenjang* samples.**

| <b>Sample code</b> | <b>Location of the company (in Republic of Korea)</b> | <b>Ingredients</b>                                       |
|--------------------|-------------------------------------------------------|----------------------------------------------------------|
| De-1               | <i>Sancheong-gun, Gyeongsangnam-do</i>                | Soybean, salt                                            |
| De-2               | <i>Buyeo-gun, Chungcheongnam-do</i>                   | Soybean, sea salt, purified water                        |
| De-3               | <i>Jeongeup-si, Jeollabuk-do</i>                      | Soybean, sea salt, purified water                        |
| De-4               | <i>Gyeongju, Gyeongsangbuk-do</i>                     | Soybean, sea salt                                        |
| De-5               | <i>Sancheong-gun, Gyeongsangnam-do</i>                | Soybean, salt                                            |
| De-6               | <i>Goryeong-gun, Gyeongsangbuk-do</i>                 | Soybean, refined salt, purified water                    |
| De-7               | <i>Gwangju</i>                                        | Soybean, sea salt, purified water, mulberry leaf extract |
| De-8               | <i>Yangpyeong-gun, Gyeonggi-do</i>                    | Soybean, sea salt, purified water                        |
| De-9               | <i>Naju, Jeollanam-do</i>                             | Soybean, <i>meju</i> , purified water, sea salt          |
| De-10              | <i>Jeju, Jeju-do</i>                                  | Soybean, refined salt                                    |
| De-11              | <i>Cheongdo-gun, Gyeongsangbuk-do</i>                 | Soybean, salt, purified water                            |
| De-12              | <i>Hongcheon-gun, Gangwon-do</i>                      | Soybean, sea salt, purified water                        |
| De-13              | <i>Cheongdo-gun, Gyeongsangbuk-do</i>                 | Soybean, sea salt, purified water                        |
| De-14              | <i>Goryeong-gun, Gyeongsangbuk-do</i>                 | <i>Meju</i> , refined salt                               |
| De-15              | <i>Gangjin-gun, Jeollanam-do</i>                      | Soybean, salt                                            |
| De-16              | <i>Chilgok-gun, Gyeongsangbuk-do</i>                  | Soybean, salt                                            |
| De-17              | <i>Gimcheon-si, Gyeongsangbuk-do</i>                  | Soybean, sea salt, purified water                        |
| De-18              | <i>Chilgok-gun, Gyeongsangbuk-do</i>                  | Soybean, sea salt, purified water                        |
| De-19              | <i>Yeongju, Gyeongsangbuk-do</i>                      | <i>Meju</i> , sea salt, purified water                   |
| De-20              | <i>Andong, Gyeongsangbuk-do</i>                       | Soybean, sea salt, purified water                        |
| De-21              | <i>Geumsan-gun, Chungcheongnam-do</i>                 | Soybean, sea salt, red chilli seed powder                |
| De-22              | <i>Jincheon-gun, Chungcheongbuk-do</i>                | Soybean, traditional soy sauce                           |
| De-23              | <i>Mungyeong-si, Gyeongsangbuk-do</i>                 | Soybean, sea salt                                        |
| De-24              | <i>Sunchang-gun, Jeollabuk-do</i>                     | Soybean, sea salt, purified water                        |
| De-25              | <i>Sunchang-gun, Jeollabuk-do</i>                     | Soybean, sea salt, purified water                        |

|       |                                       |                                                                        |
|-------|---------------------------------------|------------------------------------------------------------------------|
| De-26 | <i>Sunchang-gun, Jeollabuk-do</i>     | Soybean, sea salt, purified water                                      |
| De-27 | <i>Sunchang-gun, Jeollabuk-do</i>     | Soybean, sea salt, purified water                                      |
| De-28 | <i>Yongin-si, Gyeonggi-do</i>         | <i>Meju</i> , salt, water, red chilli, jujube,<br>roasted sesame seeds |
| De-29 | <i>Jeju, Jeju-do</i>                  | Soybean, salt                                                          |
| De-30 | <i>Sunchang-gun, Jeollabuk-do</i>     | Soybean, refined salt, purified<br>water                               |
| De-31 | <i>Wonju-si, Gangwon-do</i>           | <i>Meju</i> , purified water, sea salt                                 |
| De-32 | <i>Hapcheon-gun, Gyeongsangnam-do</i> | <i>Meju</i> , salt                                                     |
| De-33 | <i>Sacheon, Gyeongsangnam-do</i>      | Soybean, sea salt, water                                               |
| De-34 | <i>Sunchang-gun, Jeollabuk-do</i>     | Soybean, sea salt                                                      |
| De-35 | <i>Taeon-gun, Chungcheongnam-do</i>   | Soybean, sea salt                                                      |
| De-36 | <i>Iksan-si, Jeollabuk-do</i>         | Soybean, sea salt                                                      |

---

**Supplementary Table S2. pH, salinity, color values and amino nitrogen content of *doenjang* samples.**

| Sample name | pH values              | Salinity (%)               | L* values                 | Color                   |                          | Amino nitrogen (mg/100g)     |
|-------------|------------------------|----------------------------|---------------------------|-------------------------|--------------------------|------------------------------|
|             |                        |                            |                           | a* values               | b* values                |                              |
| De-1        | 6.29±0.01 <sup>c</sup> | 14.63±0.54 <sup>fgh</sup>  | 35.57±0.26 <sup>j</sup>   | 8.03±0.05 <sup>hi</sup> | 11.51±0.10 <sup>g</sup>  | 261.86±16.20 <sup>mno</sup>  |
| De-2        | 5.23±0.00 <sup>n</sup> | 15.89±0.28 <sup>c</sup>    | 29.72±0.15 <sup>v</sup>   | 4.24±0.02 <sup>o</sup>  | 5.82±0.04 <sup>qrs</sup> | 621.91±37.11 <sup>bc</sup>   |
| De-3        | 4.65±0.01 <sup>z</sup> | 13.93±0.25 <sup>hij</sup>  | 30.35±0.23 <sup>u</sup>   | 7.67±0.19 <sup>o</sup>  | 8.37±0.27 <sup>lm</sup>  | 210.42±8.10 <sup>oC</sup>    |
| De-4        | 5.10±0.01 <sup>q</sup> | 15.10±0.67 <sup>def</sup>  | 34.65±0.42 <sup>l</sup>   | 6.36±0.14 <sup>p</sup>  | 8.56±0.14 <sup>tu</sup>  | 289.91±8.10 <sup>lmn</sup>   |
| De-5        | 5.52±0.01 <sup>l</sup> | 12.82±0.31 <sup>klm</sup>  | 34.81±0.18 <sup>kl</sup>  | 5.51±0.02 <sup>b</sup>  | 9.37±0.18 <sup>a</sup>   | 346.02±29.20 <sup>ijkl</sup> |
| De-6        | 6.21±0.02 <sup>e</sup> | 14.76±0.55 <sup>efg</sup>  | 33.96±0.14 <sup>mno</sup> | 5.52±0.15 <sup>bc</sup> | 8.86±0.09 <sup>b</sup>   | 420.84±8.10 <sup>gh</sup>    |
| De-7        | 5.44±0.00 <sup>m</sup> | 13.17±0.29 <sup>ikl</sup>  | 33.73±0.03 <sup>nop</sup> | 5.95±0.07 <sup>ij</sup> | 8.68±0.03 <sup>mn</sup>  | 663.99±24.30 <sup>b</sup>    |
| De-8        | 4.83±0.01 <sup>w</sup> | 15.76±0.28 <sup>cd</sup>   | 31.26±0.27 <sup>s</sup>   | 4.85±0.11 <sup>no</sup> | 6.91±0.06 <sup>st</sup>  | 495.66±37.11 <sup>ef</sup>   |
| De-9        | 5.04±0.01 <sup>r</sup> | 12.55±0.78 <sup>lmn</sup>  | 32.00±0.15 <sup>r</sup>   | 3.95±0.15 <sup>s</sup>  | 4.83±0.22 <sup>y</sup>   | 476.95±35.30 <sup>fg</sup>   |
| De-10       | 4.97±0.01 <sup>u</sup> | 15.43±0.25 <sup>cde</sup>  | 33.60±0.36 <sup>op</sup>  | 6.24±0.04 <sup>lm</sup> | 8.64±0.27 <sup>hi</sup>  | 243.15±24.30 <sup>gh</sup>   |
| De-11       | 6.31±0.01 <sup>b</sup> | 13.27±0.28 <sup>ikl</sup>  | 37.87±0.19 <sup>g</sup>   | 6.22±0.04 <sup>fg</sup> | 9.77±0.06 <sup>d</sup>   | 420.84±69.20 <sup>gh</sup>   |
| De-12       | 4.79±0.00 <sup>y</sup> | 11.97±0.33 <sup>no</sup>   | 33.20±0.23 <sup>q</sup>   | 5.84±0.69 <sup>t</sup>  | 8.24±0.67 <sup>x</sup>   | 420.84±8.10 <sup>fg</sup>    |
| De-13       | 5.16±0.01 <sup>p</sup> | 16.03±0.00 <sup>bc</sup>   | 45.43±0.32 <sup>b</sup>   | 9.48±0.22 <sup>h</sup>  | 17.26±0.08 <sup>op</sup> | 289.91±49.26 <sup>lmn</sup>  |
| De-14       | 5.11±0.00 <sup>q</sup> | 14.21±0.26 <sup>ghi</sup>  | 46.32±0.21 <sup>a</sup>   | 9.32±0.12 <sup>n</sup>  | 16.89±0.14 <sup>st</sup> | 336.67±53.11 <sup>ijkl</sup> |
| De-15       | 4.99±0.01 <sup>t</sup> | 14.99±0.63 <sup>efg</sup>  | 34.00±0.32 <sup>mno</sup> | 7.81±0.28 <sup>g</sup>  | 9.48±0.26 <sup>c</sup>   | 341.35±42.08 <sup>ijkl</sup> |
| De-16       | 4.96±0.00 <sup>u</sup> | 14.26±0.31 <sup>gh</sup>   | 34.16±0.18 <sup>m</sup>   | 6.48±0.06 <sup>ef</sup> | 8.53±0.08 <sup>ik</sup>  | 289.91±32.40 <sup>lmn</sup>  |
| De-17       | 5.78±0.02 <sup>h</sup> | 13.50±0.50 <sup>ijk</sup>  | 29.78±0.32 <sup>v</sup>   | 4.50±0.13 <sup>k</sup>  | 5.48±0.15 <sup>f</sup>   | 392.78±16.20 <sup>hi</sup>   |
| De-18       | 5.88±0.01 <sup>g</sup> | 13.44±0.26 <sup>jk</sup>   | 36.10±0.09 <sup>i</sup>   | 7.09±0.06 <sup>ij</sup> | 10.65±0.16 <sup>k</sup>  | 743.48±21.43 <sup>aC</sup>   |
| De-19       | 5.90±0.01 <sup>f</sup> | 12.63±0.64 <sup>lmn</sup>  | 41.32±0.31 <sup>d</sup>   | 8.59±0.06 <sup>no</sup> | 13.75±0.32 <sup>y</sup>  | 439.54±24.30 <sup>gh</sup>   |
| De-20       | 4.79±0.01 <sup>y</sup> | 12.72±0.76 <sup>klmn</sup> | 33.38±0.10 <sup>pq</sup>  | 8.19±0.13 <sup>cd</sup> | 9.16±0.10 <sup>e</sup>   | 355.38±56.11 <sup>ijk</sup>  |
| De-21       | 5.67±0.01 <sup>i</sup> | 13.29±0.50 <sup>ikl</sup>  | 35.05±0.33 <sup>k</sup>   | 6.55±0.11 <sup>kl</sup> | 8.54±0.14 <sup>mn</sup>  | 495.66±28.06 <sup>ef</sup>   |
| De-22       | 5.26±0.01 <sup>v</sup> | 15.93±0.52 <sup>c</sup>    | 34.79±0.31 <sup>kl</sup>  | 7.84±0.02 <sup>rA</sup> | 10.17±0.17 <sup>x</sup>  | 308.62±21.43 <sup>klm</sup>  |
| De-23       | 4.96±0.01 <sup>u</sup> | 11.56±0.30 <sup>op</sup>   | 32.15±0.11 <sup>r</sup>   | 6.34±0.05 <sup>g</sup>  | 7.77±0.09 <sup>hij</sup> | 584.5±42.86 <sup>cd</sup>    |

|       |                        |                           |                           |                           |                           |                              |
|-------|------------------------|---------------------------|---------------------------|---------------------------|---------------------------|------------------------------|
| De-24 | 4.97±0.00 <sup>u</sup> | 12.54±0.00 <sup>lmn</sup> | 38.64±0.28 <sup>f</sup>   | 9.07±0.07 <sup>a</sup>    | 12.77±0.07 <sup>ijk</sup> | 252.5±35.30 <sup>mno</sup>   |
| De-25 | 6.24±0.01 <sup>d</sup> | 11.14±0.24 <sup>pq</sup>  | 34.10±0.01 <sup>mn</sup>  | 7.33±0.02 <sup>m</sup>    | 9.48±0.05 <sup>pq</sup>   | 617.23±49.26 <sup>bc</sup>   |
| De-26 | 5.88±0.01 <sup>g</sup> | 10.83±0.00 <sup>q</sup>   | 38.87±0.31 <sup>f</sup>   | 6.27±0.02 <sup>deB</sup>  | 10.77±0.03 <sup>f</sup>   | 341.35±24.30 <sup>ijkl</sup> |
| De-27 | 5.11±0.01 <sup>q</sup> | 12.95±0.27 <sup>klm</sup> | 32.09±0.11 <sup>r</sup>   | 6.97±0.02 <sup>n</sup>    | 8.17±0.02 <sup>g</sup>    | 528.39±53.11 <sup>def</sup>  |
| De-28 | 5.54±0.01 <sup>k</sup> | 13.00±0.46 <sup>klm</sup> | 30.86±0.02 <sup>t</sup>   | 4.88±0.02 <sup>v</sup>    | 5.98±0.02 <sup>a</sup>    | 565.8±14.03 <sup>fg</sup>    |
| De-29 | 4.81±0.01 <sup>x</sup> | 16.65±0.43 <sup>ab</sup>  | 33.89±0.20 <sup>mno</sup> | 8.47±0.25 <sup>defA</sup> | 10.59±0.17 <sup>d</sup>   | 598.53±35.30 <sup>ef</sup>   |
| De-30 | 5.18±0.01 <sup>o</sup> | 11.73±0.29 <sup>op</sup>  | 33.11±0.08 <sup>q</sup>   | 9.75±0.02 <sup>o</sup>    | 10.43±0.01 <sup>l</sup>   | 224.45±29.20 <sup>o</sup>    |
| De-31 | 5.01±0.00 <sup>s</sup> | 14.45±0.30 <sup>fgh</sup> | 36.55±0.12 <sup>h</sup>   | 7.07±0.05 <sup>no</sup>   | 8.94±0.08 <sup>rst</sup>  | 322.64±29.20 <sup>ijkl</sup> |
| De-32 | 5.87±0.01 <sup>g</sup> | 12.26±0.26 <sup>mno</sup> | 37.99±0.17 <sup>g</sup>   | 8.87±0.06 <sup>q</sup>    | 12.09±0.07 <sup>no</sup>  | 542.42±21.43 <sup>de</sup>   |
| De-33 | 5.57±0.01 <sup>j</sup> | 13.90±0.29 <sup>hij</sup> | 38.78±0.04 <sup>f</sup>   | 6.53±0.03 <sup>q</sup>    | 11.72±0.02 <sup>pqr</sup> | 416.16±8.10 <sup>gh</sup>    |
| De-34 | 6.83±0.02 <sup>a</sup> | 14.93±0.53 <sup>efg</sup> | 29.74±0.16 <sup>v</sup>   | 3.63±0.03 <sup>p</sup>    | 4.12±0.01 <sup>qrs</sup>  | 579.82±14.03 <sup>cd</sup>   |
| De-35 | 5.23±0.00 <sup>n</sup> | 16.79±0.54 <sup>a</sup>   | 41.44±0.04 <sup>d</sup>   | 8.83±0.02 <sup>r</sup>    | 13.69±0.04 <sup>w</sup>   | 233.8±35.30 <sup>no</sup>    |
| De-36 | 5.10±0.01 <sup>g</sup> | 13.00±0.27 <sup>klm</sup> | 38.64±0.18 <sup>f</sup>   | 6.24±0.10 <sup>u</sup>    | 9.82±0.17 <sup>z</sup>    | 383.43±37.11 <sup>hij</sup>  |

---

Different superscripts in the column represent the statically difference between the samples at  $p<0.05$

**Supplementary Table S3. Enzymes and their substrate**

| Sr. No. | Substrate                                        | Enzyme                                     |
|---------|--------------------------------------------------|--------------------------------------------|
| 1.      | 2-Naphthyl phosphate                             | Alkaline phosphatase                       |
| 2.      | 2-Naphthyl butyrate                              | Esterase                                   |
| 3.      | 2-Naphthyl caprylate                             | Esterase lipase                            |
| 4.      | 2-Naphthyl myristate                             | Lipase                                     |
| 5.      | L-Leucyl-2-naphthylamide                         | Leucine arylamidase                        |
| 6.      | L-Valyl-2-naphthylamide                          | Valine arylamidase                         |
| 7.      | L-Cystyl-2-naphthylamide                         | Cystine arylamidase                        |
| 8.      | <i>N</i> -Benzoyl-DL-arginine-2-naphthylamide    | Trypsin                                    |
| 9.      | <i>N</i> -Glutaryl-phenylalanine-2-naphthylamide | $\alpha$ -Chymotrypsin                     |
| 10.     | 2-Naphthyl phosphate                             | Acid phosphatase                           |
| 11.     | Naphthol-AS-BI-phosphate                         | Naphthol-AS-BI-phosphohydrolase            |
| 12.     | 6-Br-2-Naphthyl- $\alpha$ D-galactopyranoside    | $\alpha$ -Galactosidase                    |
| 13.     | 2-Naphthyl- $\beta$ D-galactopyranoside          | $\beta$ -Galactosidase                     |
| 14.     | Naphthol-AS-BI- $\beta$ D-glucuronide            | $\beta$ -Glucuronidase                     |
| 15.     | 2-Naphthyl- $\alpha$ D-glucopyranoside           | $\alpha$ -Glucosidase                      |
| 16.     | 6-Br-2-Naphthyl- $\beta$ D-glucopyranoside       | $\beta$ -Glucosidase                       |
| 17.     | 1-Naphthyl-N-acetyl- $\beta$ D-glucosaminide     | <i>N</i> -Acetyl- $\beta$ -glucosaminidase |
| 18.     | 6-Br-2-naphthyl- $\alpha$ D-mannopyranoside      | $\alpha$ -Mannosidase                      |
| 19.     | 2-Naphthyl- $\alpha$ L-fucopyranoside            | $\alpha$ -Fucosidase                       |

**Supplementary Table S4: Limit of detection (LOD) and limit of quantification (LOQ) for different biogenic amines**

| <b>Biogenic amine</b> | <b><math>R^2</math></b> | <b>Standard error intercept</b> | <b>Standard deviation intercept</b> | <b>Slope</b> | <b>LOD (mg/kg)</b> | <b>LOQ (mg/kg)</b> |
|-----------------------|-------------------------|---------------------------------|-------------------------------------|--------------|--------------------|--------------------|
| <b>TRP</b>            | 0.9999                  | 0.0096                          | 0.0255                              | 0.8337       | 0.1009             | 0.3059             |
| <b>PHE</b>            | 0.9999                  | 0.0086                          | 0.0229                              | 0.8127       | 0.0931             | 0.2823             |
| <b>PUT</b>            | 0.9984                  | 0.0650                          | 0.1721                              | 1.6610       | 0.3419             | 1.0362             |
| <b>CAD</b>            | 0.9994                  | 0.0351                          | 0.0930                              | 1.4816       | 0.2071             | 0.6277             |
| <b>HIS</b>            | 0.9930                  | 0.0819                          | 0.2167                              | 0.9896       | 0.7226             | 2.1898             |
| <b>TYR</b>            | 0.9988                  | 0.0498                          | 0.1320                              | 1.4450       | 0.3014             | 0.9135             |
| <b>SPD</b>            | 0.9974                  | 0.0641                          | 0.1696                              | 1.2610       | 0.4438             | 1.3449             |
| <b>SPM</b>            | 0.9891                  | 0.1436                          | 0.3518                              | 1.1626       | 0.9986             | 3.0261             |

## Supplementary Methods

### M 1. Determination of pH and salinity

The *doenjang* samples pH values were determined by using a pH meter (Thermo Electron Corporation, Beverly, MA, USA) (Lee et al., 2018).

The salinity of the *doenjang* samples was determined by the Korea Food and Drug Administration method (Korea Food and Drug Administration, 2019). In brief, 1 g of *doenjang* sample was used to prepare ash at 550°C, which was diluted to 500 fold with distilled water. Approximately 2-3 drops of potassium chromate solution were added to 10 mL of diluted ash sample and were titrated against 0.02 N silver nitrate, till the yellow color reaction mixture turned to brown color. The total percentage of salinity was calculated by using the following formula,

$$\text{Salinity (\%)} = (V \times F \times D \times 0.00117/S) \times 100$$

where, V: volume of 0.02 N AgNO<sub>3</sub>, F: factor of 0.02 N AgNO<sub>3</sub> (at 25 °C). D: dilution factor, S: total weight of the sample.

### M 2. Evaluation of the color value

The color values of *doenjang* were analyzed in a Konica Minolta Chroma Meter (Konica Minolta Inc., Tokyo, Japan). The tristimulus color analyzer was calibrated to a reference (white porcelain plate) before the experiment. The color coordinates were recorded with Hunter scale values (L\*, a\*, and b\* values). The L\* value designates the brightness that extended from black (L\* = 0) to white (L\* = 100); a\* value specifies redness from green (a\* = -60) to red (a\* = +60); b\* value indicates yellowness from b\* = -60 (blue) to b\* = +60 (yellow) (Lee et al., 2018).

### M 3. Determination of free amino nitrogen

Total free amino nitrogen of *doenjang* samples was determined by the titration method described by Korea Food and Drug Administration (2014). About 4 g of *doenjang* sample was mixed and stirred with 200 mL of distilled water for 30 min and filtered, the pH of the filtered *doenjang* solution (50 mL) was adjusted to 8.5. The 35% formalin solution (20 mL) was added with the filtered *doenjang* solution and then titrated against NaOH (0.1 N) until a pH of 8.5 was attained. Total amino nitrogen content of the *doenjang* was determined by applying the following formula,

$$\text{Amino nitrogen (mg/100g)} = ((V_1 - V_2) \times F \times D \times 1.4)/S \times 100$$

where, V<sub>1</sub>: the volume of 0.1 N NaOH (without sample), V<sub>2</sub>: the volume of 0.1 N NaOH (with sample), F: factor of 0.1 N NaOH, D: dilution factor, 1.4: nitrogen equivalent in 1 mL of 0.1 N NaOH, S: sample weight.

### M 4. Crystalline protein staining

For the identification of *B. thuringiensis*, crystal protein staining was performed using USFDA (FDA, 2012) method as adopted by Bahuguna et al. (2020). Briefly, bacterial isolate was grown on nutrient agar medium and incubated at 30 °C for 24 h, followed by 5 days of incubation at room temperature. After incubation, bacterial smear was prepared, air-dried, and fixed by gentle heating. The bacterial smear was flooded with methanol for 30 s, followed by the addition of 0.5% basic fuchsin. Slides were heated gently until steam appeared. Finally, slides were rinsed with water and visualized under the microscope (SOMETECH, Seoul, Republic of Korea) for the presence of tetragonal (diamond-shaped) toxin crystals.
